# Supplementary material for: Striatal Activity Underlies Novelty-Based Choice in Humans
Source: PubMed Central journal article supplement (PMC2535823; doi:10.1016/j.neuron.2008.04.027), 2008-06-26

## Neuron, Volume 58

### Supplemental Data

#### Striatal Activity Underlies Novelty-Based Choice in Humans

Bianca C. Wittmann, Nathaniel D. Daw, Ben Seymour,  
and Raymond J. Dolan

Table S1.

Prediction error response: Anatomical locations of regions correlating with the standard TD model. Data are thresholded at  $p < 0.001$ , uncorrected, and only clusters with  $> 5$  voxels are reported.

| Area                          | Left / Right | MNI coordinates |     |     | T value |
|-------------------------------|--------------|-----------------|-----|-----|---------|
|                               |              | x               | y   | z   |         |
| Insula                        | L            | -28             | 22  | 8   | 4.09    |
| Ventral putamen               | R            | 16              | 12  | -4  | 5.25    |
|                               | L            | -20             | 14  | -10 | 4.25    |
| Thalamus                      | L            | -12             | -14 | 6   | 4.63    |
|                               | L            | -20             | -22 | -2  | 4.47    |
|                               | R            | 18              | -26 | -2  | 4.38    |
| Parahippocampal gyrus, BA 19  | L            | -20             | -74 | -4  | 7.1     |
| Middle occipital gyrus, BA 19 | L            | -32             | -82 | 12  | 4.12    |
| Middle occipital gyrus, BA 18 | R            | 22              | -86 | -14 | 10.94   |

Table S2.

Novelty bonus response: Anatomical locations of regions with activity correlating with additional prediction error due to inclusion of a novelty bonus. Data are thresholded at  $p < 0.001$ , uncorrected, and only clusters with  $> 5$  voxels are reported.

| Area                            | Left / Right | MNI coordinates |     |     | T value      |
|---------------------------------|--------------|-----------------|-----|-----|--------------|
|                                 |              | x               | y   | z   |              |
| Middle frontal gyrus, BA 46     | R            | 46              | 34  | 18  | <b>4.41</b>  |
| Inferior frontal gyrus, BA 47   | L            | -14             | 30  | -18 | <b>5.54</b>  |
|                                 | R            | 32              | 26  | 2   | <b>4.11</b>  |
| Nucleus accumbens               | R            | 14              | 20  | -10 | <b>4.63</b>  |
| Insula, BA 13                   | R            | 36              | 26  | 20  | <b>5.48</b>  |
|                                 | R            | 38              | 20  | 8   | <b>4.72</b>  |
|                                 | R            | 40              | 4   | 22  | <b>4.27</b>  |
|                                 | R            | 50              | -22 | 24  | <b>4.3</b>   |
|                                 | L            | -38             | -40 | 22  | <b>5.41</b>  |
| Superior frontal gyrus, BA 8    | L            | -6              | 12  | 54  | <b>5.29</b>  |
| Inferior frontal gyrus, BA 9    | R            | 46              | 6   | 32  | <b>4.36</b>  |
| Medial frontal gyrus, BA 6      | R            | 8               | -2  | 54  | <b>4.5</b>   |
| Precentral gyrus, BA 6          | L            | -38             | 0   | 26  | <b>5.95</b>  |
| Cingulate gyrus, BA 32          | R            | 12              | 8   | 44  | <b>6.13</b>  |
| Inferior parietal lobule, BA 40 | L            | -58             | -22 | 26  | <b>4.02</b>  |
| Postcentral gyrus, BA 3         | L            | -32             | -24 | 50  | <b>4.29</b>  |
| Postcentral gyrus, BA 2         | R            | 40              | -28 | 42  | <b>5.71</b>  |
| Inferior parietal lobule, BA 40 | L            | -42             | -34 | 44  | <b>4.62</b>  |
| Posterior cingulate, BA 31      | L            | -20             | -60 | 20  | <b>6.66</b>  |
| Middle occipital gyrus, BA 19   | L            | -30             | -68 | -12 | <b>15.72</b> |
|                                 | R            | 44              | -74 | 2   | <b>4.66</b>  |
|                                 | L            | -42             | -80 | 14  | <b>4.15</b>  |
| Thalamus                        | R            | 8               | -12 | 4   | <b>5.47</b>  |
|                                 | L            | -18             | -20 | 4   | <b>5.32</b>  |
|                                 | L            | -6              | -26 | -6  | <b>5.27</b>  |

Figure S1.

Activation in left ventral striatum correlating with individual novelty seeking as measured by the TPQ.

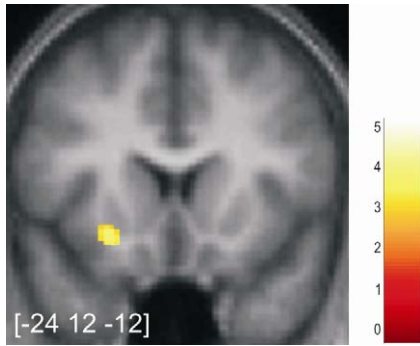

Supplement: mmc1.pdf [file mmc1.pdf]
